# Supplementary material
Source: publisher figshare collection journal article supplement (https://frontiersin.figshare.com/ndownloader/files/23012339)
Supplement: Supplementary file [file 23012339]

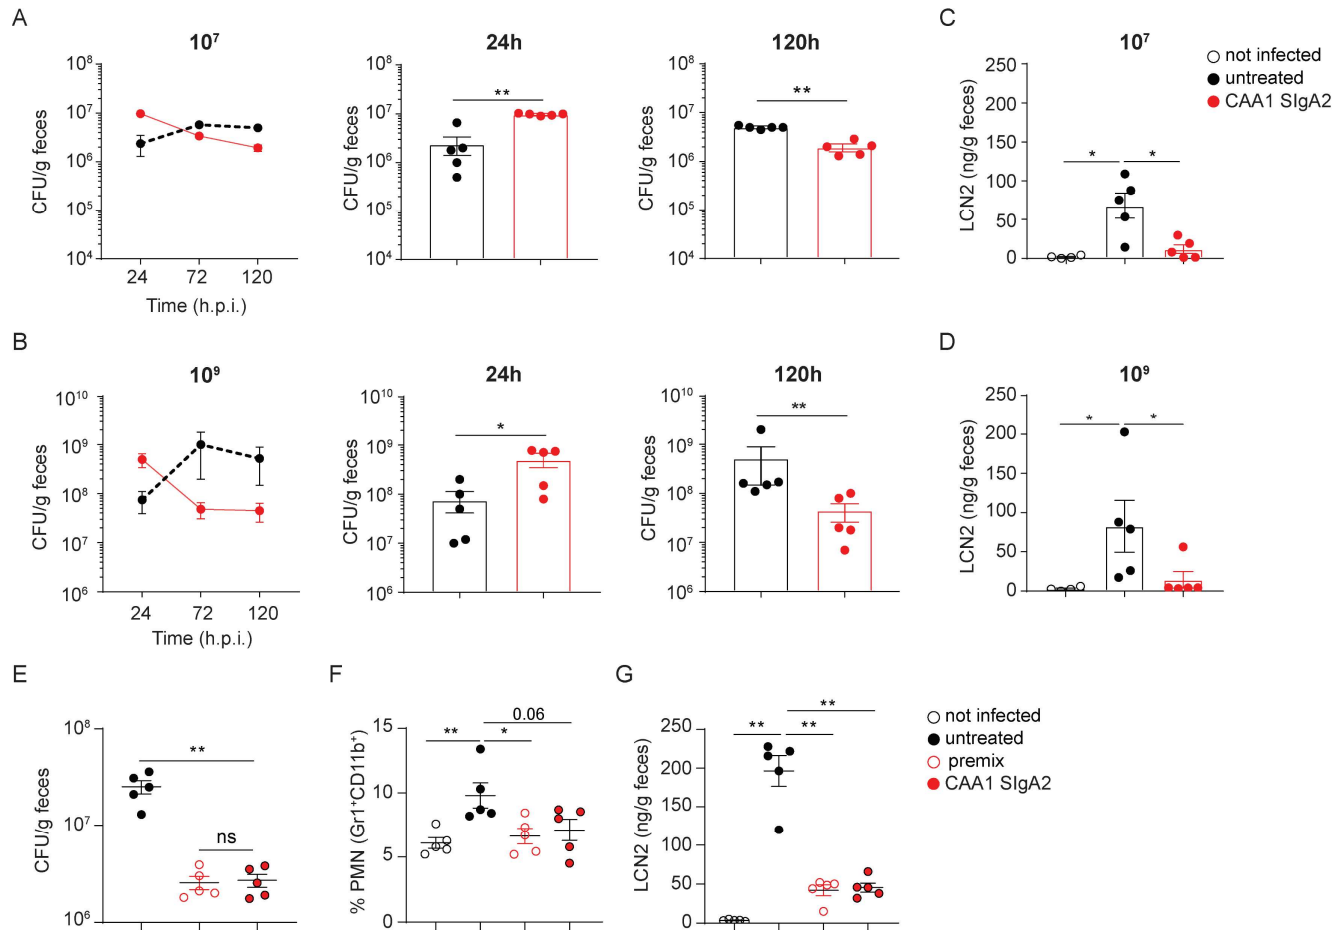

**Supplemental Figure 5. Prophylactic activity of CAA1 SIgA at different *C. jejuni* infection doses.**

(A-B) Quantification of the fecal bacterial load (CFU) in 21-day-old C57BL/6 mice administered via gavage with 200  $\mu$ g of CAA1 SIgA2 as measured at 24, 72 and 120h post-infection with  $10^7$  or  $10^9$  CFU of *C. jejuni*. (C-D) Quantification of fecal lipocalin-2 (LCN2) in 21-day-old C57BL/6 mice administered via gavage with 200  $\mu$ g of CAA1 SIgA2 as measured at 120h post-infection with  $10^7$  or  $10^9$  CFU of *C. jejuni*. (E-G) The prophylactic activity exerted by oral administration of CAA1 SIgA2 two hours before infection was compared with the one provided by pre-mixing of the mAb with *C. jejuni* 81-176. Quantification of the bacterial shedding (E), polymorphonucleated cells (PMN) infiltration in the caecum, gated as Gr1<sup>+</sup>CD11b<sup>+</sup> (F), and lipocalin-2 (LCN2) in the stools (G) are reported. Dots represent individual mice and results are shown as  $\pm$  SEM. Mann-Whitney test (A-G) was used. \*p < 0.05, \*\*p < 0.01. One representative experiment out of at least two is shown.
